# Supplementary material for: Mitochondrial D310 mutation as clonal marker for solid tumors
Source: Virchows Arch. 2015 Aug 15;467(5):595–602. doi: 10.1007/s00428-015-1817-5 (PMC4656708; doi:10.1007/s00428-015-1817-5)
Supplement: Supplementary file 2 — (XLS 59 kb) [file 428_2015_1817_MOESM2_ESM.xls]

## Sheet: Supplementary Table 2
Article title				Mitochondrial D310 mutation as clonal marker for solid tumors
Journal name				Virchows Archiv
Author names				Willemina RR Geurts-Giele*, Gerard HGK Gathier, Peggy N Atmodimedjo, Hendrikus J Dubbink, Winand NM Dinjens
Affiliation corresponding author				Department of Pathology, Erasmus MC Cancer Institute, University Medical Center Rotterdam, The Netherlands
Email address corresponding author				w.geurts-giele@erasmusmc.nl
Online Resource 2. Routine genomic versus mitochondrial DNA results for 84 patients with a D310 mutation in at least one of their tumors.
	T1		T2		T3		T4		T5		Genomic DNA results				Mitochondrial DNA results
Patient	Tissue	Year	Tissue	Year	Tissue	Year	Tissue	Year	Tissue	Year	TP53 mutation	LOH	Other	Conclusion	N	T1	T2	T3	T4	T5	T6	T7	Conclusion
Concordant: 2 primary tumors
9	Larynx	2003	Pleura	2006							Exon 5 (SSCP) mutation only T2		MSI only T1	T1≠T2	7	7	9						T1≠T2
22	Lung	1994	Larynx	2006								4 markers		T1≠T2	8	7	8						T1≠T2
25	Breast	2003	Breast	2006							Exon 5 (SSCP) mutation only T2	5 markers		T1≠T2	8	9	8						T1≠T2
26	Adnex	2006	Kidney	2006								4 markers		T1≠T2	NE	8	9						T1≠T2
36	Tonsil	2006	Lung	2007							Exon 6 (SSCP) mutation only T1	4 markers		T1≠T2	8	7	8						T1≠T2
51	Tonsil	2007	Oesophagus	2007	Lung	2007					Exon 6 (SSCP) mutation only T3	4 markers		(T1=T2)≠T3	8	8	8	9					(T1=T2)≠T3
63	Cervix	2006	Colon	2007	Liver	2007					E180* only in T3	8 markers		T1≠T3 & T2≠T3	8	8	8	10					(T1=T2)≠T3
64	Lung	2007	Adrenal gland	2007								5 markers		T1≠T2	8	10	8						T1≠T2
95	Lymphnode	2000	Breast	2008							K123R only in T2	5 markers		T1≠T2	8	7	8						T1≠T2
118	Prostate	2002	Skin	2008								4 markers		T1≠T2	7	7	8						T1≠T2
152	Breast	1993	Breast	2009								2 markers	P53 IHC	T1≠T2	8	7	8						T1≠T2
155	Breast	1993	Breast	2009								3 markers	P53 IHC	T1≠T2	9	9	8						T1≠T2
163	Tongue	2008	Maxilla	2009								5 markers	P53 IHC	T1≠T2	7	7	9						T1≠T2
185	Colon	2006	Colon	2010								8 markers		T1≠T2	8	7	8						T1≠T2
200	Breast	2010	Peritoneum	2010								8 markers		T1≠T2	8	8	7						T1≠T2
211	Rectum	2002	Duodenum	2010							R273H only in T1	4 markers		T1≠T2	8	9	10						T1≠T2
213	Larynx	2005	Oesophagus	2010							Exon 5 splice site mutation only in T2	8 markers		T1≠T2	8	8	7						T1≠T2
216	Breast	1998	Bladder	2010								3 markers	PIK3CA H1047L only in T1, P53 IHC	T1≠T2	8	8	9						T1≠T2
232	Breast	2001	Breast	2010							Y220C only in T2	6 markers		T1≠T2	8	8	7						T1≠T2
240	Mouth	2010	Lung	2010							Q192_H193delinsHY only in T1, R158L only in T2			T1≠T2	8	9	8						T1≠T2
250	Mouth	2007	Lung	2011							R65* only in T2	7 markers		T1≠T2	9	9	8						T1≠T2
263	Abdomen	1999	Pelvis	2011								7 markers		T1≠T2	8	7	8						T1≠T2
272	Mouth	2009	Lung	2011								4 markers	P53 IHC	T1≠T2	8	9	8						T1≠T2
314	Skin	2011	Skin	2011								3 markers	BRAF V600E only in T2	T1≠T2	NE	9	8						T1≠T2
315	Vagina	2011	Liver	2011	Breast	2011					R110fs only in T2 and T3	Multiple markers		T1≠(T2=T3)	8	8	9	9					T1≠(T2=T3)
352	Lung	2012	Lung	2012							Q52* only in T1, S127Y only in T2	3 markers		T1≠T2	8	8	7						T1≠T2
367	Colon	2012	Lymphnode	2012							D259fs only in T1, E258* only in T2			T1≠T2	9	10	7						T1≠T2
368	Lung	2010	Pancreas	2012								4 markers	P53 IHC	T1≠T2	8	7	8						T1≠T2
371	Breast	2008	Ovary	2011	Liver	2012	Liver	2012			V173L only in T2, T3 and T4		PIK3CA E545K only in T1	T1≠(T2=T3=T4)	8	7	8	8	8				T1≠(T2=T3=T4)
373	Breast	2010	Ovary	2011							R248W only in T1, R248Q only in T2			T1≠T2	8	9	8						T1≠T2
382	Mouth	2012	Oesophagus	2013							Q317* only in T1, exon 8 splice site mutation only in T2			T1≠T2	7	10	6						T1≠T2
Concordant: clonally related tumors
6	Nasopharynx	2006	Maxillary sinus	2006								4 markers		T1=T2	8	9	9						T1=T2
41	Breast	2002	Liver	2007								11 markers		T1=T2	9	7	7						T1=T2
59	Skin	1996	Lung	2007								5 markers	BRAF V600E, P53 IHC	T1=T2	8	9	9						T1=T2
62	Colon	2004	Colon	2006								7 markers		T1=T2	9	8	8						T1=T2
93	Liver	2006	Liver	2008								4 markers	P53 IHC	T1=T2	8	7	7						T1=T2
137	Tonsil	2008	Nasal cavity	2009							R282W	5 markers		T1=T2	8	7	7						T1=T2
143	Lymphnode	2008	Epiglottis	2008	Lung	2009					V272fs	6 markers		T1=T2=T3	8	7	7	NE					T1=T2
177	Oesophagus	2009	Oesophagus	2009							V173L			T1=T2	7	8	8						T1=T2
184	Liver	2007	Colon	2010								5 markers	P53 IHC	T1=T2	8	10	10						T1=T2
196	Ovary	2010	Endometrium	2010									MSI, MLH1 promotor hypermethylation, P53 IHC	T1=T2	7	10	10						T1=T2
265	Larynx	2010	Lung	2011							P190L			T1=T2	8	10	10						T1=T2
270	Lymphnode	2011	Lymphnode	2011								7 markers		T1=T2	8	9	9						T1=T2
299	Ovary	2011	Uterus	2011									MSI, MLH1 promotor hypermethylation	T1=T2	8	7	7						T1=T2
326	Colon	2006	Lung	2012							I195T			T1=T2	8	9	9						T1=T2
344	Scrotum	2012	Pleura	2012								6 markers		T1=T2	8	10	10						T1=T2
347	Skin	2009	Lung	2012								6 markers		T1=T2	8	9	9						T1=T2
362	Breast	2011	Lung	2012	Skin	2012					C135Y			T1=T2=T3	8	10	10	10					T1=T2=T3
365	Breast	2012	Colon	2012									MSI, MLH1 promotor hypermethylation, BRAF V600E	T1=T2	8	del	del						T1=T2
366	Colon	2010	Lung	2012							S99fs and V143G			T1=T2	8	9	9						T1=T2
379	Colon	2012	Bladder	2013							K132R		CTNBB1 T41A	T1=T2	8	7	7						T1=T2
380	Breast	2011	Skin	2013								3 markers	PIK3CA H1047R	T1=T2	7	8	8						T1=T2
Mitochondrial DNA: 2 primary tumors; genomic DNA: clonally related tumors
3	Skin	2003	Skin	2003							Exon 8 (SSCP) mutation	3 markers		T1=T2	7	7	8						T1≠T2
12	Breast	2003	Peritoneum	2004							Exon 5 (SSCP) mutation	5 markers		T1=T2	NE	8	9						T1≠T2
104	Lung	2008	Lung	2008	Liver	2008						6 markers	P53 IHC	T1=T2=T3	8	8	9	8					(T1=T3)≠T2
139	Lung	2007	Lung	2009								5 markers		T1=T2	8	8	7						T1≠T2
237	Oesophagus	2010	Oesophagus	2010							L111R			T1=T2	8	9	8						T1≠T2
245	Colon	2008	Lung	2010							P19del		KRAS G12A	T1=T2	7	7	8						T1≠T2
268	Larynx	2010	Lung	2011							R174W	8 markers		T1=T2	8	8	9						T1≠T2
334	Tonsil	2008	Lymphnode	2012								3 markers		T1=T2	8	9	8						T1≠T2
350	Larynx	2010	Larynx	2010	Lung	2012						5 markers	P53 IHC	T1=T2=T3	NE	7	8	7					(T1=T3)≠T2
Mitochondrial DNA: clonally related tumors; genomic DNA: 2 primary tumors
27	Stomach	2000	Pancreas	2006							Exon 8 (SSCP) mutation only T1	5 markers		T1≠T2	8	7	7						T1=T2
219	Lung	2007	Small intestine	2010	Small intestine	2010					G245A only in T2 & T3, c.560-1G>C only in T1			T1≠(T2=T3)	9	10	10	10					T1=T2=T3
248	Breast	2000	Breast	2010								7 markers		T1≠T2	9	8	8						T1=T2
262	Breast	2003	Breast	2011							Y163C only in T1			T1≠T2	9	8	8						T1=T2
275	Pancreas	2003	Liver	2011							S121Y and R158H only in T2			T1≠T2	8	9	9						T1=T2
324	Epiglottis	2011	Lung	2012							Y220C only in T1, Y205C only in T2			T1≠T2	8	9	9						T1=T2
346	Lymphnode	2011	Palatum	2012								4 markers		T1≠T2	9	10	10						T1=T2
Discordant: complex
178	Bladder	2003	Lung	2004	Small intestine	2004						3 markers	KRAS Q61H only in T2 and T3, P53 IHC	T1≠(T2=T3)	8	8	8	7					(T1=T2)≠T3
187	Oropharynx	2004	Skin	2006	Lung	2010	Lung	2010			Y234C only in T3	Multiple markers	KRAS G12D only in T2, P53 IHC	T1≠T2≠T3≠T4	8	8	8	7	7				(T1=T2)≠(T3=T4)
306	Pharynx	2011	Mouth	2011	Larynx	2011	Lung	2011				Multiple markers (T3 no results)	P53 IHC	T1≠T2≠T4	7	7	8	7	7				(T1=T3=T4)≠T2
316	Oesophagus	1999	Oesophagus	2002	Oesophagus	2011					K132N only in T2 (T1 no result)		P53 IHC	T2≠T3	NE	7	6	6					T1≠(T2=T3)
340	Lung	1990	Bladder	2007	Breast	2009	Groin	2012	Bladder	2012	K139N only in T2, T4 and T5 (T1 no result)			(T2=T4=T5)≠T3	8	10	8	8	8	9			T1≠(T2=T3=T4)≠T5
No comparison possible
46	Breast	1989	Breast	2007										No conclusion	8	8	9						T1≠T2
69	Stomach	2007	Colon	2007										No conclusion	8	7	8						T1≠T2
91	Tonsil	2006	Skin	2008								1 marker	P53 IHC	T1=T2 (uncertain)	8	9	9						T1=T2
107	Colon	1995	Colon	1995	Vertebra	2008								No conclusion	8	9	9	8					(T1=T2)≠T3
121	Thorax	1996	Skin	1998	Breast	2008								No conclusion	8	8	8	10					(T1=T2)≠T3
126	Breast	2000	Peritoneum	2008										No conclusion	8	8	7						T1≠T2
173	Breast	2009	Breast	2009										No conclusion	9	7	9						T1≠T2
179	Skin	2008	Breast	2009								3 markers	P53 IHC	T1=T2 (uncertain)	8	9	8						T1≠T2
246	Oesophagus	2011	Oesophagus	2011										No conclusion	7	10	7						T1≠T2
259	Ovary	2011	Endometrium	2011	Ovary	2011								No conclusion	8	10	9	10					(T1=T3)≠T2
372	Tongue	2012	Pleural fluid	2012									P53 IHC	T1=T2 (uncertain)	8	9	8						T1≠T2
Abbreviations: del, deletion; NE, non-evaluable; T1, tumor 1
